# Supplementary material for: Nucleophilic ring-opening of iron(iii)-hydroxy-isoporphyrin
Source: Royal Society of Chemistry journal article supplement (doi:10.1039/c5dt03905c), 2015-12-24
Supplement: c5dt03905c1.pdf [file c5dt03905c1.pdf]

**Supporting Information**  
**Nucleophilic Ring-opening of Iron(III)-hydroxy-isoporphyrin**

**Jagannath Bhuyan\***

Department of Chemistry, North Eastern Regional Institute of Science and Technology, Nirjuli, Arunachal Pradesh-791109  
India

## Synthesis:

Synthesis of chloro[5-(hydroxy)-5,10,15,20-tetrakis(4-methyl)-5,21H-porphinato]iron(III) [Fe(4-Me-HTPI)(Cl)]<sup>-</sup> (**1**)

Nitrogen dioxide (NO + O<sub>2</sub>) gas was passed through a dichloromethane solution of 100 mg (0.13 mmol) *meso*-tetrakis (4-methylphenyl)porphyriniron(III) chloride for 45 seconds. The solution was layered with three times petroleum ether (60-80 C°) and collected the crystalline product after three days. Yield 50 mg (51%) Molecular Formula: C<sub>48</sub>H<sub>37</sub>ClFeN<sub>4</sub>O; Molecular Weight: 776.200; UV/Vis (CH<sub>2</sub>Cl<sub>2</sub>) λ<sub>max</sub>(ε/ mol<sup>-1</sup>dm<sup>3</sup>cm<sup>-1</sup>): 430 (65121), 820 (8511), 905 (11871) nm. FTIR (cm<sup>-1</sup>); 1518 [ν<sub>a</sub> NO<sub>3</sub><sup>-</sup>], 1258 [ν<sub>s</sub> NO<sub>3</sub><sup>-</sup>], 1026 [ν NO<sub>3</sub><sup>-</sup>].

Synthesis of chloro[5-(hydroxy)-5,10,15,20-tetrakis(4-methoxy)-5,21H-porphinato]iron(III) [Fe(4-Me-HTPI)(Cl)]<sup>-</sup> (**2**)

To a dichloromethane solution of 100 mg (0.12 mmol) *meso*-tetrakis (4-methoxyphenyl)porphyriniron(III) chloride nitrogen dioxide gas (NO + O<sub>2</sub>) was passed for 45 seconds. The solution was layered with three times petroleum ether (60-80 C°) and collected the precipitate after three days. Yield 55 mg (56%) Molecular Formula: C<sub>48</sub>H<sub>37</sub>ClFeN<sub>4</sub>O<sub>5</sub>; Molecular Weight: 840.180; UV/Vis (CH<sub>2</sub>Cl<sub>2</sub>) λ<sub>max</sub>(ε/ mol<sup>-1</sup>dm<sup>3</sup>cm<sup>-1</sup>): 342 (59161), 425 (66134), 805 (8823), 912 (11456) nm); FTIR (cm<sup>-1</sup>); 1512 [ν<sub>a</sub> NO<sub>3</sub><sup>-</sup>], 1252 [ν<sub>s</sub> NO<sub>3</sub><sup>-</sup>], 1026 [ν NO<sub>3</sub><sup>-</sup>].

### Reaction with alcohols (methanol):

A sample of 2 mg (2 X 10<sup>-5</sup> mol) of isoporphyrin **1** was dissolved in methanol and the spectral changes were observed by electronic spectroscopy. The resulting reaction mixture was analysed for ESI-mass analysis.

### Reactions with N-nucleophiles:

A sample of 0.05 mL pyridine was added to a 5 mL dichloromethane solution of iron(III) hydroxy-isoporphyrin **1** (2 X 10<sup>-5</sup> mol) under argon atmosphere. The solution turned into greenish colour due to the formation of iron benzoyl bilinone.

### Reactions with S-nucleophiles:

A sample of 0.1 mL thiophenol was added to a 10 mL dichloromethane solution of iron(III) hydroxy-isoporphyrin **1** and **2** ( $2 \times 10^{-5}$  mol) with trace pyridine under argon atmosphere and the electronic spectral changes was observed.

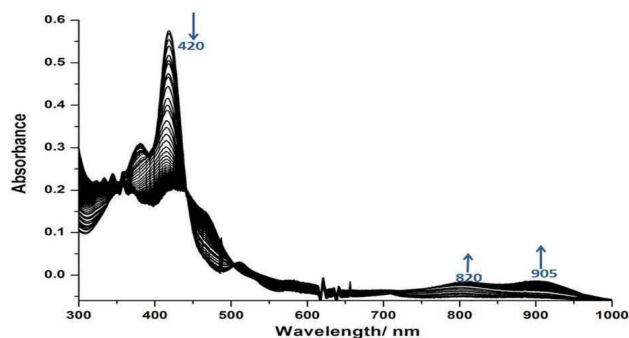

**Figure S1.** Spectral changes of meso-tetrakis(4-methylphenyl)porphyriniron(III) chloride [Fe(4-Me-TPP)Cl] in chloroform on passing NO<sub>2</sub> gas for 30 seconds. The appearance of new peaks at 820 and 905 nm and decrease in intensity of the Soret band supports the formation of iron isoporphyrin.

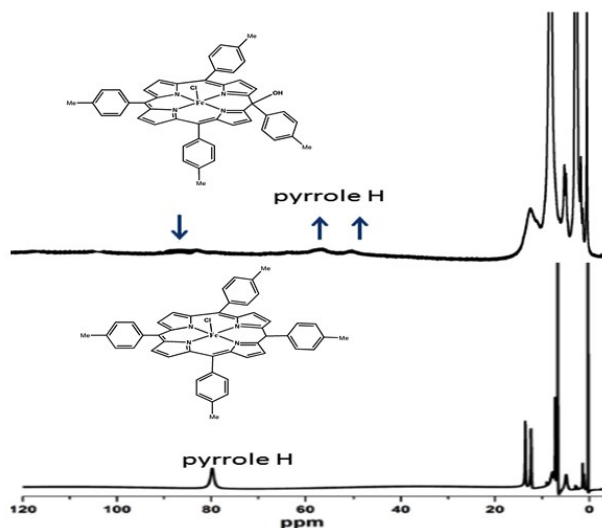

**Figure S2.** <sup>1</sup>H NMR spectra of meso-tetrakis(4-methoxyphenyl)porphyriniron(III) chloride [Fe(4-Me-TPP)Cl] and hydroxy-isoporphyrin **1** in CD<sub>3</sub>Cl.

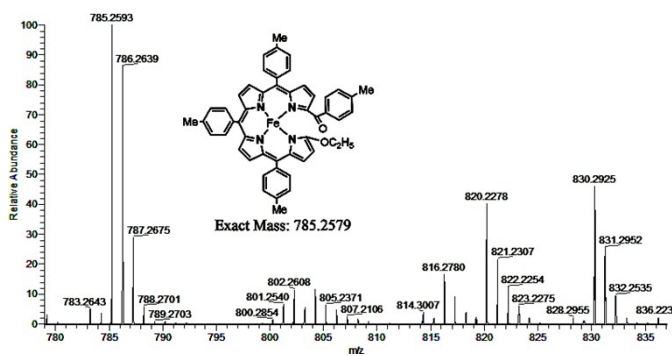

**Figure S3.** Positive mode ESI-mass spectrum of ring opened 19-benzoyl-1ethoxy-bilin iron complex formed in the reaction of isoporphyrin **1** with ethanol.

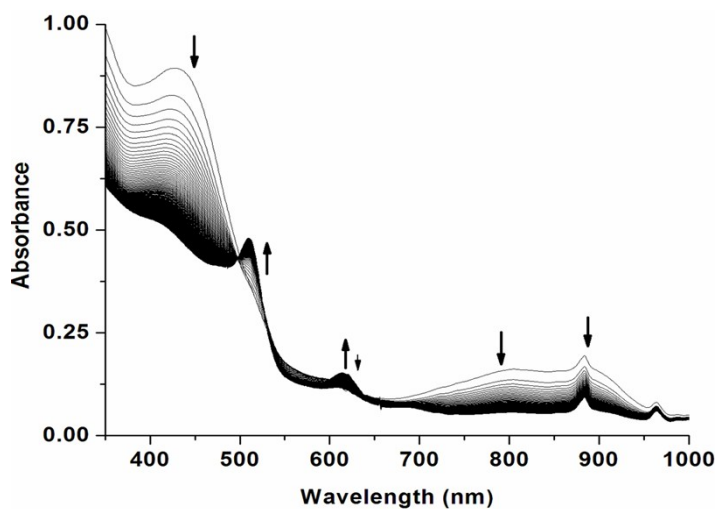

**Figure S4.** Spectral changes of iron isoporphyrin **1** in dichloromethane on addition of 100 times CAN.

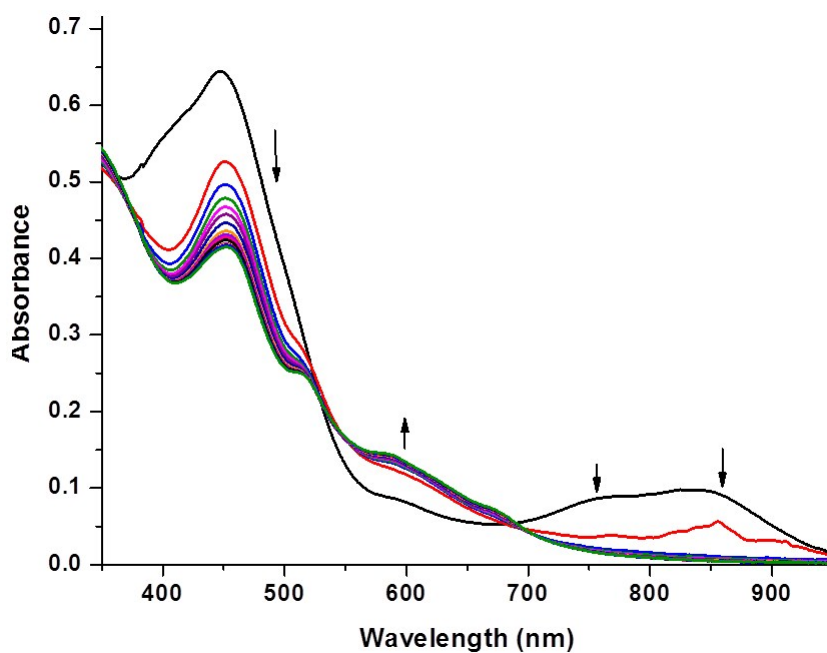

**Figure S5.** Spectral changes of iron isoporphyrin **1** in dichloromethane on addition of excess n-octylamine.

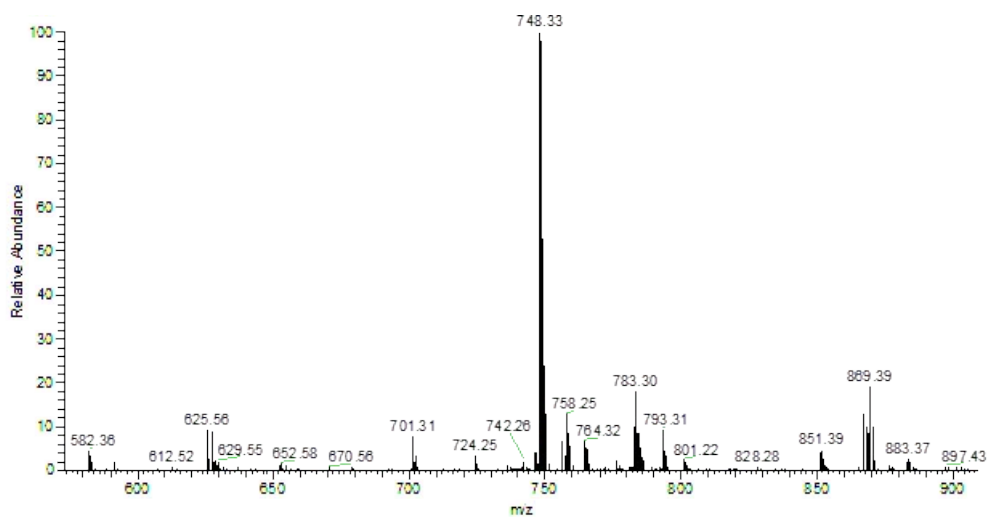

**Figure S6.** Part of the ESI Mass spectrum of ring opened 19-benzyl-1-octylamin-bilin iron complex formed in the reaction of isoporphyrin **1** with n-octylamine. Parent ion,  $[C_{56}H_{54}FeN_5O + H]^+$  is identified.

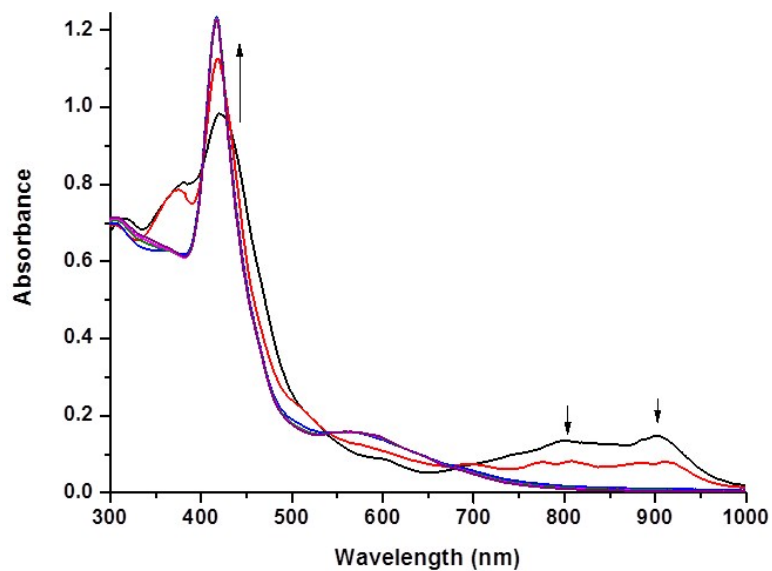

**Figure S7.** Reduction of iron hydroxy isoporphyrin **2** to parent iron tetraphenyl porphyrin by thiophenol, trace pyridine. (Total time 15 minutes).

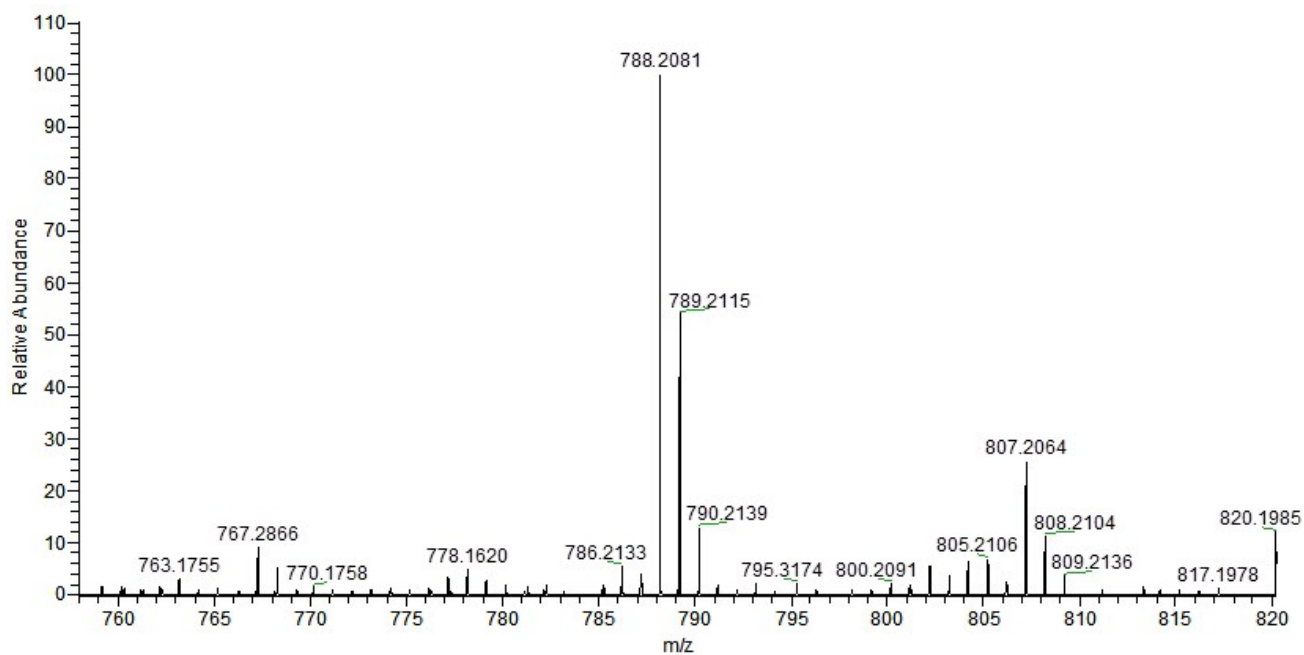

**Figure S8.** Positive mode ESI-mass spectrum of meso-tetrakis(4-methoxyphenyl)porphyriniron(III) complex ( $m/z = 788.20$ ) formed in the reaction of isoporphyrin **2** with thiophenol.

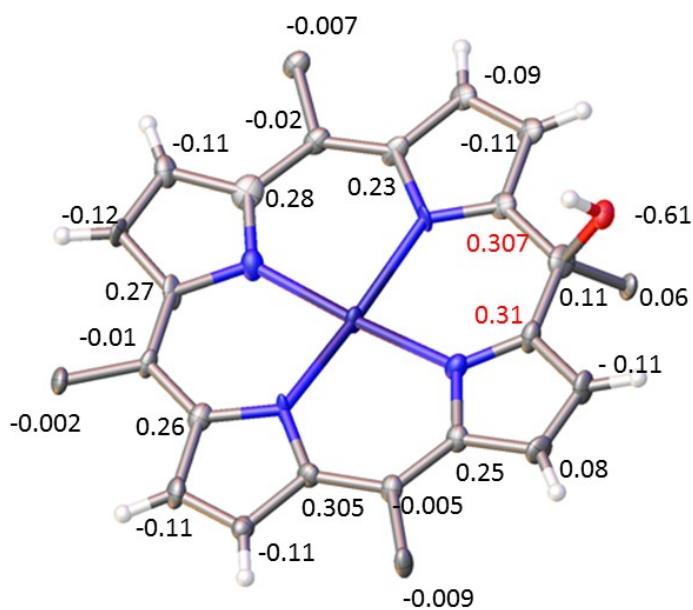

**Figure S9.** Mulliken atomic charges for atoms of the iron hydroxy isoporphyrin **3**. The neighboring two carbon atoms of the saturated meso carbon atom (displayed as red in colour) have higher positive charges than other carbon atoms, which suggest the nucleophilic attack at the adjacent carbon atom of the saturated *meso* carbon atom.
